# Supplementary material for: DFT insights into crystal plane effects of molybdenum phosphide (MoP) on the catalytic performance in deoxygenation of palmitic acid
Source: Royal Society of Chemistry journal article supplement (doi:10.1039/d3cy01179h), 2023-11-25

## Supplementary for

### DFT Insights into Crystal Plane Effects of Molybdenum Phosphide (MoP) on the Catalytic Performance in Deoxygenation of Palmitic Acid

Suparada kamchompoo,<sup>1</sup> Yutthana Wongnongwa,<sup>2</sup> Manaschai Kunaseth,<sup>2\*</sup> Siriporn Jungsuttiwong<sup>1\*</sup>

<sup>1</sup>Department of Chemistry and Center of Excellence for Innovation in Chemistry, Faculty of Science, Ubon Ratchathani University, Ubon Ratchathani 34190, Thailand

<sup>2</sup>NSTDA Supercomputer Center (ThaiSC), National Science and Technology Development Agency (NSTDA), Klong Luang, Pathum Thani 12120, Thailand

\*E-mail: [siriporn.j@ubu.ac.th](mailto:siriporn.j@ubu.ac.th) and [manaschai@nanotec.or.th](mailto:manaschai@nanotec.or.th)

### The adsorption of butanal and butanol on MoP (001) and MoP (101) surfaces

➤ Fig. S1. Optimized structures of butanal adsorption on MoP (001) surface

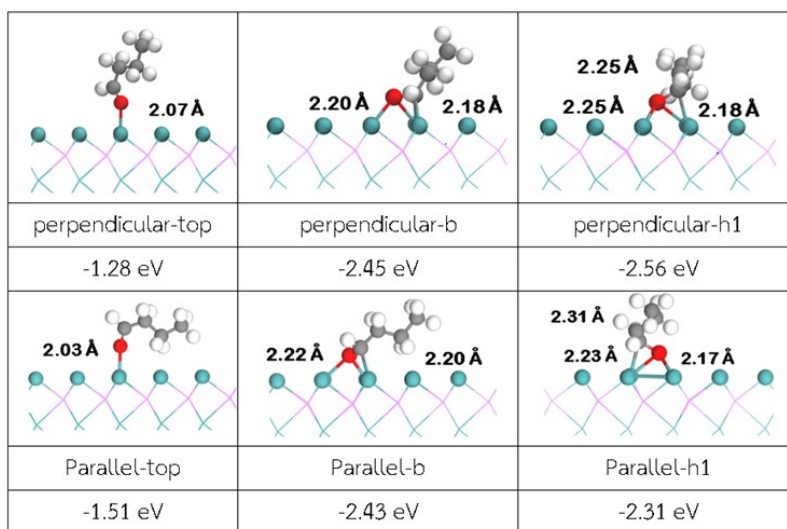

➤ Fig. S2. Optimized structures of butanol adsorption on MoP (001) surface

|                   |                 |                  |                  |
|-------------------|-----------------|------------------|------------------|
|                   |                 |                  |                  |
| perpendicular-top | perpendicular-b | perpendicular-h1 | perpendicular-h2 |
| -1.34 eV          | -1.25 eV        | -1.42 eV         | -1.31 eV         |
|                   |                 |                  |                  |
| Parallel-top      | Parallel-b      | Parallel-h1      | Parallel-h2      |
| -1.37 eV          | -1.25 eV        | -1.24 eV         | -1.25 eV         |

➤ Fig. S3. Optimized structures of butanol adsorption on MoP (101) surface

|                   |                 |              |            |
|-------------------|-----------------|--------------|------------|
|                   |                 |              |            |
| perpendicular-top | perpendicular-b | Parallel-top | Parallel-b |
| -1.16 eV          | -1.43 eV        | -1.10 eV     | -1.04 eV   |

➤ Fig. S4. Optimized structures of butanol adsorption on MoP (101) surface

|                   |              |            |
|-------------------|--------------|------------|
|                   |              |            |
| perpendicular-top | Parallel-top | Parallel-b |
| -1.16 eV          | -1.12 eV     | -1.12 eV   |

## H<sub>2</sub> dissociation

- Fig. S5. Energy profiles and structures along the H<sub>2</sub> dissociation on MoP (001) and MoP (101) surfaces

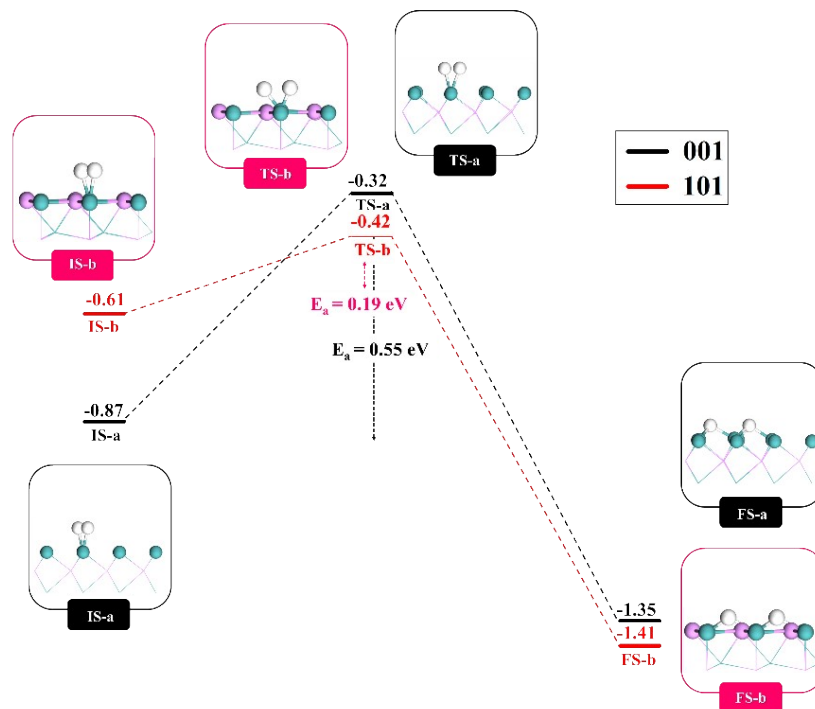

## DX reaction mechanism on MoP (001) surface

- Fig. S6. The butyric acid conversion to butanal pathway on MoP (001) surface

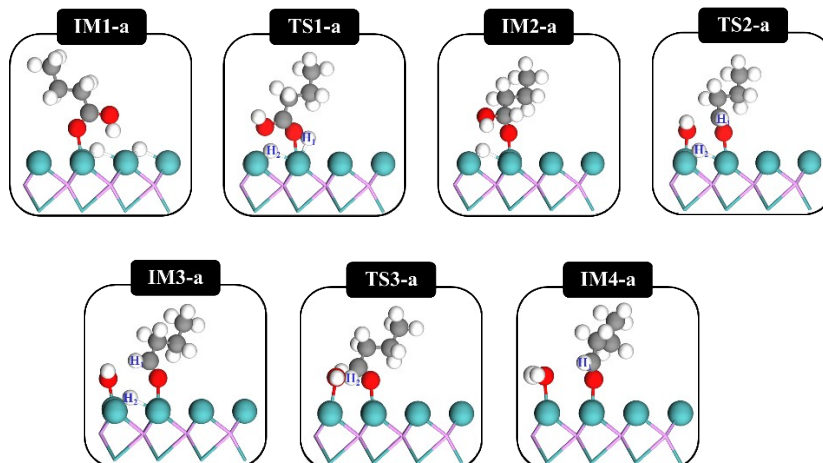

➤ Fig. S7. The butanal conversion to butanol pathway on MoP (001) surface

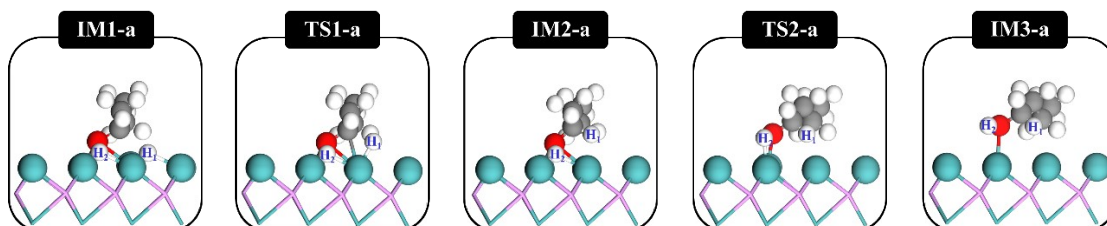

➤ Fig. S8. The butanol conversion to butane pathway on MoP (001) surface

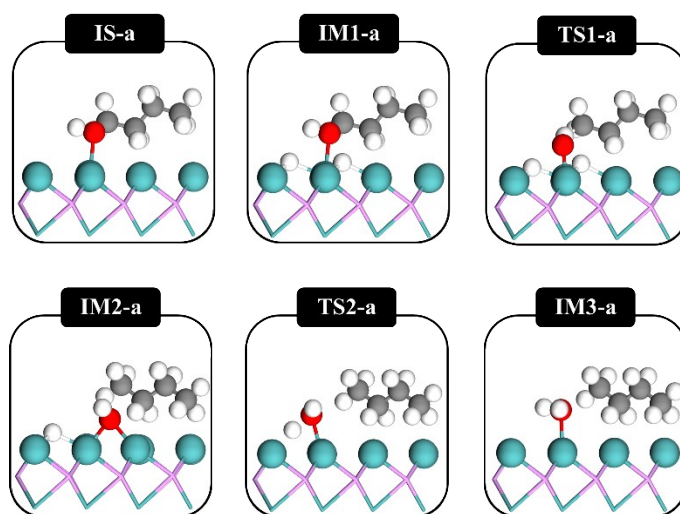

➤ Fig. S9. The butanal conversion to propane pathway on MoP (001) surface

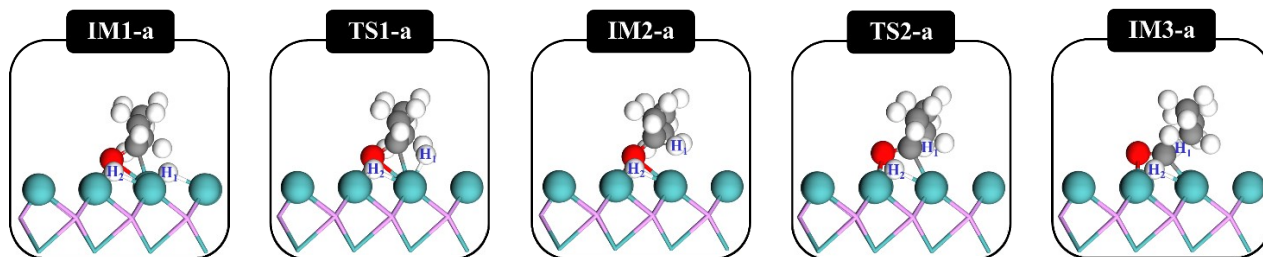

Supplement: d3cy01179h1.pdf [file d3cy01179h1.pdf]
